# Supplementary material for: Comprehensive analysis of m6A modification in immune infiltration, metabolism and drug resistance in hepatocellular carcinoma
Source: Cancer Cell Int. 2024 Apr 16;24:138. doi: 10.1186/s12935-024-03307-3 (PMC11022358; doi:10.1186/s12935-024-03307-3)
Supplement: Supplementary file 3 — Supplementary Material 3 [file 12935_2024_3307_MOESM3_ESM.xlsx]

## Sheet: Table S3
Table S3 Correlation between 147 DEGs and glucose metabolism
		Glycolysis
IGF2BP1	Spearman Corr.	0.15581
IGF2BP1	p-value	5.1802e-05
MSI1	Spearman Corr.	0.18261
MSI1	p-value	1.9914e-06
AFP	Spearman Corr.	0.16878
AFP	p-value	1.1389e-05
IGF2BP2	Spearman Corr.	0.20564
IGF2BP2	p-value	8.02746e-08
SALL2	Spearman Corr.	0.30977
SALL2	p-value	2.40711e-16
BEX2	Spearman Corr.	0.25804
BEX2	p-value	1.228e-11
TRIM17	Spearman Corr.	0.30295
TRIM17	p-value	1.14685e-15
ARID3A	Spearman Corr.	0.27686
ARID3A	p-value	3.0881e-13
H2AFY2	Spearman Corr.	0.27134
H2AFY2	p-value	9.36626e-13
DUSP9	Spearman Corr.	0.20724
DUSP9	p-value	6.33238e-08
LRRC1	Spearman Corr.	0.28117
LRRC1	p-value	1.27396e-13
MYBL2	Spearman Corr.	0.33907
MYBL2	p-value	1.84382e-19
GPC3	Spearman Corr.	0.0502
GPC3	p-value	0.19469
DQX1	Spearman Corr.	0.1846
DQX1	p-value	1.53149e-06
MCCD1	Spearman Corr.	0.16046
MCCD1	p-value	3.05045e-05
SLC29A4	Spearman Corr.	0.30615
SLC29A4	p-value	5.54581e-16
H19	Spearman Corr.	0.17544
H19	p-value	5.0016e-06
SALL4	Spearman Corr.	0.12721
SALL4	p-value	0.000975182
UPK3A	Spearman Corr.	0.23399
UPK3A	p-value	9.00351e-10
DKK1	Spearman Corr.	0.19256
DKK1	p-value	5.21354e-07
TRIM71	Spearman Corr.	0.13419
TRIM71	p-value	0.000501053
WNK2	Spearman Corr.	0.36031
WNK2	p-value	6.13511e-22
CDCA7	Spearman Corr.	0.37722
CDCA7	p-value	4.75819e-24
SOAT2	Spearman Corr.	0.1332
SOAT2	p-value	0.000551732
PDE9A	Spearman Corr.	0.22078
PDE9A	p-value	7.87158e-09
DYDC2	Spearman Corr.	0.12158
DYDC2	p-value	0.00163
EVC2	Spearman Corr.	0.27773
EVC2	p-value	2.58364e-13
MMP11	Spearman Corr.	0.40098
MMP11	p-value	3.12564e-27
GNAZ	Spearman Corr.	0.31777
GNAZ	p-value	3.66774e-17
GAL3ST1	Spearman Corr.	0.31407
GAL3ST1	p-value	8.81885e-17
SLC13A2	Spearman Corr.	0.00585
SLC13A2	p-value	0.87992
PRR15L	Spearman Corr.	0.12861
PRR15L	p-value	0.000855426
CTNND2	Spearman Corr.	0.29066
CTNND2	p-value	1.72036e-14
MAPK13	Spearman Corr.	0.43579
MAPK13	p-value	2.20616e-32
DMKN	Spearman Corr.	0.25762
DMKN	p-value	1.33003e-11
B4GALNT2	Spearman Corr.	0.15517
B4GALNT2	p-value	5.5689e-05
PNMA3	Spearman Corr.	0.20943
PNMA3	p-value	4.56042e-08
FER1L6	Spearman Corr.	0.09545
FER1L6	p-value	0.01352
OCA2	Spearman Corr.	0.21101
OCA2	p-value	3.5953e-08
VIL1	Spearman Corr.	0.06593
VIL1	p-value	0.08839
MDK	Spearman Corr.	0.3309
MDK	p-value	1.47482e-18
IGSF1	Spearman Corr.	0.16799
IGSF1	p-value	1.25333e-05
HMGA2	Spearman Corr.	0.28756
HMGA2	p-value	3.33815e-14
UNC93A	Spearman Corr.	0.01299
UNC93A	p-value	0.73737
COL2A1	Spearman Corr.	0.16268
COL2A1	p-value	2.35704e-05
FOXQ1	Spearman Corr.	0.14789
FOXQ1	p-value	0.000123518
ZIC5	Spearman Corr.	0.10267
ZIC5	p-value	0.00787
CXCL17	Spearman Corr.	0.14304
CXCL17	p-value	0.000205792
PEG10	Spearman Corr.	0.02594
PEG10	p-value	0.50304
PLEKHB1	Spearman Corr.	0.39764
PLEKHB1	p-value	9.08481e-27
SLC7A10	Spearman Corr.	0.16572
SLC7A10	p-value	1.64576e-05
WNK4	Spearman Corr.	0.14561
WNK4	p-value	0.00015727
ETV4	Spearman Corr.	0.24517
ETV4	p-value	1.29489e-10
CACNG4	Spearman Corr.	0.10434
CACNG4	p-value	0.00691
HS6ST2	Spearman Corr.	0.33515
HS6ST2	p-value	5.03819e-19
FXYD2	Spearman Corr.	0.39705
FXYD2	p-value	1.09401e-26
SLC6A11	Spearman Corr.	0.12122
SLC6A11	p-value	0.00168
ANXA13	Spearman Corr.	0.17172
ANXA13	p-value	7.94992e-06
PGC	Spearman Corr.	0.13106
PGC	p-value	0.000678186
IGF2	Spearman Corr.	-0.04581
IGF2	p-value	0.23666
EPCAM	Spearman Corr.	0.29546
EPCAM	p-value	6.06388e-15
ENPP3	Spearman Corr.	0.04472
ENPP3	p-value	0.24801
PRAME	Spearman Corr.	0.29091
PRAME	p-value	1.63043e-14
FRAS1	Spearman Corr.	0.34801
FRAS1	p-value	1.75836e-20
GPC5	Spearman Corr.	0.11527
GPC5	p-value	0.00283
ISX	Spearman Corr.	0.07554
ISX	p-value	0.05082
TRIM50	Spearman Corr.	0.15248
TRIM50	p-value	7.50795e-05
MEP1A	Spearman Corr.	0.15452
MEP1A	p-value	5.98767e-05
S100A14	Spearman Corr.	0.20581
S100A14	p-value	7.83583e-08
S100P	Spearman Corr.	0.3398
S100P	p-value	1.52375e-19
GNG4	Spearman Corr.	0.22646
GNG4	p-value	3.14789e-09
PDX1	Spearman Corr.	0.13189
PDX1	p-value	0.000626258
DLK1	Spearman Corr.	0.04687
DLK1	p-value	0.22604
C1orf106	Spearman Corr.	0.31998
C1orf106	p-value	2.16075e-17
FAM3B	Spearman Corr.	0.04529
FAM3B	p-value	0.2421
CDHR2	Spearman Corr.	0.18643
CDHR2	p-value	1.20019e-06
MYH4	Spearman Corr.	0.10587
MYH4	p-value	0.00613
XPNPEP2	Spearman Corr.	-0.02161
XPNPEP2	p-value	0.57686
LOXL4	Spearman Corr.	0.15956
LOXL4	p-value	3.38658e-05
SLC16A9	Spearman Corr.	0.2824
SLC16A9	p-value	9.87379e-14
MEG3	Spearman Corr.	0.18539
MEG3	p-value	1.37851e-06
CD24	Spearman Corr.	0.29349
CD24	p-value	9.32463e-15
PEG3	Spearman Corr.	-0.03668
PEG3	p-value	0.34356
SULT1C2	Spearman Corr.	0.32425
SULT1C2	p-value	7.66556e-18
EPS8L3	Spearman Corr.	0.2645
EPS8L3	p-value	3.58499e-12
NPC1L1	Spearman Corr.	0.0858
NPC1L1	p-value	0.02647
PITX1	Spearman Corr.	0.35861
PITX1	p-value	9.83414e-22
NPW	Spearman Corr.	0.04902
NPW	p-value	0.20543
CYP3A7	Spearman Corr.	0.00287
CYP3A7	p-value	0.94089
SPINK1	Spearman Corr.	0.25156
SPINK1	p-value	4.08936e-11
MFAP3L	Spearman Corr.	-0.19484
MFAP3L	p-value	3.79908e-07
BCO2	Spearman Corr.	-0.1569
BCO2	p-value	4.58351e-05
SLC46A3	Spearman Corr.	-0.20709
SLC46A3	p-value	6.48171e-08
HSD11B1	Spearman Corr.	-0.27443
HSD11B1	p-value	5.04471e-13
UBXN10	Spearman Corr.	-0.24693
UBXN10	p-value	9.45341e-11
MYRIP	Spearman Corr.	-0.22943
MYRIP	p-value	1.93312e-09
TTC36	Spearman Corr.	-0.37782
TTC36	p-value	3.9867e-24
SLC28A1	Spearman Corr.	-0.16058
SLC28A1	p-value	3.00836e-05
MFSD2A	Spearman Corr.	-0.10625
MFSD2A	p-value	0.00595
SLC1A1	Spearman Corr.	-0.13304
SLC1A1	p-value	0.000560831
CTH	Spearman Corr.	-0.31015
CTH	p-value	2.2047e-16
GYS2	Spearman Corr.	-0.41696
GYS2	p-value	1.60065e-29
CYP8B1	Spearman Corr.	-0.38145
CYP8B1	p-value	1.34831e-24
ACADL	Spearman Corr.	-0.30728
ACADL	p-value	4.27543e-16
AKR7A3	Spearman Corr.	-0.19569
AKR7A3	p-value	3.37057e-07
ACSM5	Spearman Corr.	-0.27615
ACSM5	p-value	3.56738e-13
C5orf27	Spearman Corr.	-0.15594
C5orf27	p-value	5.10882e-05
TAT	Spearman Corr.	-0.34883
TAT	p-value	1.41215e-20
ADH1B	Spearman Corr.	-0.41217
ADH1B	p-value	8.01957e-29
GLYAT	Spearman Corr.	-0.41066
GLYAT	p-value	1.32543e-28
MT1X	Spearman Corr.	-0.10707
MT1X	p-value	0.00557
UGT2B7	Spearman Corr.	-0.22975
UGT2B7	p-value	1.83238e-09
UGT2B15	Spearman Corr.	-0.26741
UGT2B15	p-value	2.03481e-12
ADH1C	Spearman Corr.	-0.27392
ADH1C	p-value	5.58979e-13
CYP1A2	Spearman Corr.	-0.25887
CYP1A2	p-value	1.05004e-11
SLC22A1	Spearman Corr.	-0.3063
SLC22A1	p-value	5.34782e-16
UGT1A5	Spearman Corr.	-0.22734
UGT1A5	p-value	2.72711e-09
NAT2	Spearman Corr.	-0.24834
NAT2	p-value	7.33665e-11
PRAMEF10	Spearman Corr.	-0.0505
PRAMEF10	p-value	0.19207
FNDC5	Spearman Corr.	-0.33684
FNDC5	p-value	3.27105e-19
THRSP	Spearman Corr.	-0.16149
THRSP	p-value	2.70952e-05
C6	Spearman Corr.	-0.26983
C6	p-value	1.26326e-12
AQP9	Spearman Corr.	-0.45803
AQP9	p-value	5.28269e-36
ALDH1L1	Spearman Corr.	-0.28077
ALDH1L1	p-value	1.38471e-13
GREM2	Spearman Corr.	-0.21896
GREM2	p-value	1.05041e-08
CYP2A6	Spearman Corr.	-0.27085
CYP2A6	p-value	1.03263e-12
MT2A	Spearman Corr.	0.00479
MT2A	p-value	0.90151
UGT1A4	Spearman Corr.	-0.3037
UGT1A4	p-value	9.66938e-16
CYP3A4	Spearman Corr.	-0.30169
CYP3A4	p-value	1.52197e-15
PCK1	Spearman Corr.	-0.33002
PCK1	p-value	1.83584e-18
CYP1A1	Spearman Corr.	-0.25333
CYP1A1	p-value	2.95327e-11
GCK	Spearman Corr.	-0.03879
GCK	p-value	0.3165
UGT1A3	Spearman Corr.	-0.24769
UGT1A3	p-value	8.24771e-11
BHMT	Spearman Corr.	-0.3745
BHMT	p-value	1.06124e-23
CFHR5	Spearman Corr.	-0.27242
CFHR5	p-value	7.55075e-13
SLC10A1	Spearman Corr.	-0.4294
SLC10A1	p-value	2.16333e-31
HPD	Spearman Corr.	-0.31624
HPD	p-value	5.28493e-17
CYP2C8	Spearman Corr.	-0.32944
CYP2C8	p-value	2.12593e-18
HSD17B13	Spearman Corr.	-0.19345
HSD17B13	p-value	4.60721e-07
ADH4	Spearman Corr.	-0.32305
ADH4	p-value	1.02734e-17
CYP2A7	Spearman Corr.	-0.25116
CYP2A7	p-value	4.3967e-11
SDS	Spearman Corr.	-0.02767
SDS	p-value	0.47488
PAGE4	Spearman Corr.	-0.19609
PAGE4	p-value	3.18469e-07
PDZK1IP1	Spearman Corr.	0.1075
PDZK1IP1	p-value	0.00538
SAA1	Spearman Corr.	0.07888
SAA1	p-value	0.0414
SAA2	Spearman Corr.	0.11058
SAA2	p-value	0.00419
ALDH3A1	Spearman Corr.	-0.06484
ALDH3A1	p-value	0.09382
Glycolysis	Spearman Corr.	1
Glycolysis	p-value	--
