# Supplementary material for: Comprehensive analysis of m6A modification in immune infiltration, metabolism and drug resistance in hepatocellular carcinoma
Source: Cancer Cell Int. 2024 Apr 16;24:138. doi: 10.1186/s12935-024-03307-3 (PMC11022358; doi:10.1186/s12935-024-03307-3)
Supplement: Supplementary file 4 — Supplementary Material 4 [file 12935_2024_3307_MOESM4_ESM.xlsx]

## Sheet: Table S4
Table S4 Correlation Between 147 DEGs and Immunescore
		ImmuneScore
IGF2BP1	Spearman Corr.	-0.03735
IGF2BP1	p-value	0.33476
MSI1	Spearman Corr.	0.1017
MSI1	p-value	0.00848
AFP	Spearman Corr.	0.06694
AFP	p-value	0.08363
IGF2BP2	Spearman Corr.	0.06396
IGF2BP2	p-value	0.09835
SALL2	Spearman Corr.	0.05766
SALL2	p-value	0.1363
BEX2	Spearman Corr.	0.05217
BEX2	p-value	0.1777
TRIM17	Spearman Corr.	0.08231
TRIM17	p-value	0.03329
ARID3A	Spearman Corr.	0.14242
ARID3A	p-value	0.000219264
H2AFY2	Spearman Corr.	0.11558
H2AFY2	p-value	0.00275
DUSP9	Spearman Corr.	-0.01102
DUSP9	p-value	0.77592
LRRC1	Spearman Corr.	0.0801
LRRC1	p-value	0.03833
MYBL2	Spearman Corr.	0.05623
MYBL2	p-value	0.14628
GPC3	Spearman Corr.	-0.05435
GPC3	p-value	0.16026
DQX1	Spearman Corr.	-0.01531
DQX1	p-value	0.69272
MCCD1	Spearman Corr.	-0.00768
MCCD1	p-value	0.84279
SLC29A4	Spearman Corr.	-0.00661
SLC29A4	p-value	0.8646
H19	Spearman Corr.	0.13859
H19	p-value	0.000324041
SALL4	Spearman Corr.	0.05684
SALL4	p-value	0.14194
UPK3A	Spearman Corr.	0.01647
UPK3A	p-value	0.67074
DKK1	Spearman Corr.	0.09474
DKK1	p-value	0.01423
TRIM71	Spearman Corr.	0.0086
TRIM71	p-value	0.82427
WNK2	Spearman Corr.	0.12875
WNK2	p-value	0.000844789
CDCA7	Spearman Corr.	0.1757
CDCA7	p-value	4.84191e-06
SOAT2	Spearman Corr.	0.0457
SOAT2	p-value	0.23779
PDE9A	Spearman Corr.	0.13345
PDE9A	p-value	0.00053848
DYDC2	Spearman Corr.	0.05418
DYDC2	p-value	0.16161
EVC2	Spearman Corr.	0.22193
EVC2	p-value	6.54937e-09
MMP11	Spearman Corr.	0.19632
MMP11	p-value	3.0831e-07
GNAZ	Spearman Corr.	0.09954
GNAZ	p-value	0.00999
GAL3ST1	Spearman Corr.	-0.05896
GAL3ST1	p-value	0.12766
SLC13A2	Spearman Corr.	0.03117
SLC13A2	p-value	0.4209
PRR15L	Spearman Corr.	-0.02912
PRR15L	p-value	0.45214
CTNND2	Spearman Corr.	0.08944
CTNND2	p-value	0.02068
MAPK13	Spearman Corr.	0.26091
MAPK13	p-value	7.13789e-12
DMKN	Spearman Corr.	0.12714
DMKN	p-value	0.000981897
B4GALNT2	Spearman Corr.	-0.00942
B4GALNT2	p-value	0.80785
PNMA3	Spearman Corr.	0.04348
PNMA3	p-value	0.26143
FER1L6	Spearman Corr.	-0.04396
FER1L6	p-value	0.25617
OCA2	Spearman Corr.	0.08822
OCA2	p-value	0.02249
VIL1	Spearman Corr.	-0.15376
VIL1	p-value	6.51299e-05
MDK	Spearman Corr.	0.13796
MDK	p-value	0.000345186
IGSF1	Spearman Corr.	0.031
IGSF1	p-value	0.42344
HMGA2	Spearman Corr.	0.09303
HMGA2	p-value	0.01609
UNC93A	Spearman Corr.	-0.02211
UNC93A	p-value	0.56812
COL2A1	Spearman Corr.	-0.0652
COL2A1	p-value	0.09197
FOXQ1	Spearman Corr.	0.01468
FOXQ1	p-value	0.70476
ZIC5	Spearman Corr.	0.00704
ZIC5	p-value	0.85581
CXCL17	Spearman Corr.	0.1297
CXCL17	p-value	0.000771901
PEG10	Spearman Corr.	-0.16924
PEG10	p-value	1.07806e-05
PLEKHB1	Spearman Corr.	0.33714
PLEKHB1	p-value	3.02877e-19
SLC7A10	Spearman Corr.	-0.02998
SLC7A10	p-value	0.43883
WNK4	Spearman Corr.	0.04246
WNK4	p-value	0.27274
ETV4	Spearman Corr.	0.09626
ETV4	p-value	0.01274
CACNG4	Spearman Corr.	-0.07206
CACNG4	p-value	0.06249
HS6ST2	Spearman Corr.	0.11878
HS6ST2	p-value	0.00209
FXYD2	Spearman Corr.	0.29731
FXYD2	p-value	4.03464e-15
SLC6A11	Spearman Corr.	-0.01443
SLC6A11	p-value	0.70943
ANXA13	Spearman Corr.	0.09982
ANXA13	p-value	0.00978
PGC	Spearman Corr.	-0.02562
PGC	p-value	0.50821
IGF2	Spearman Corr.	0.01238
IGF2	p-value	0.74919
EPCAM	Spearman Corr.	0.13068
EPCAM	p-value	0.000703462
ENPP3	Spearman Corr.	-0.07921
ENPP3	p-value	0.04054
PRAME	Spearman Corr.	0.02664
PRAME	p-value	0.49158
FRAS1	Spearman Corr.	0.17447
FRAS1	p-value	5.65176e-06
GPC5	Spearman Corr.	0.00111
GPC5	p-value	0.97716
ISX	Spearman Corr.	-0.05765
ISX	p-value	0.13637
TRIM50	Spearman Corr.	0.01334
TRIM50	p-value	0.73046
MEP1A	Spearman Corr.	-0.01501
MEP1A	p-value	0.69841
S100A14	Spearman Corr.	0.10675
S100A14	p-value	0.00571
S100P	Spearman Corr.	0.16167
S100P	p-value	2.65137e-05
GNG4	Spearman Corr.	-0.01163
GNG4	p-value	0.76389
PDX1	Spearman Corr.	0.04163
PDX1	p-value	0.28233
DLK1	Spearman Corr.	0.04988
DLK1	p-value	0.19753
C1orf106	Spearman Corr.	0.09751
C1orf106	p-value	0.01162
FAM3B	Spearman Corr.	-0.07384
FAM3B	p-value	0.05628
CDHR2	Spearman Corr.	0.21466
CDHR2	p-value	2.05511e-08
MYH4	Spearman Corr.	0.04125
MYH4	p-value	0.28664
XPNPEP2	Spearman Corr.	-0.04184
XPNPEP2	p-value	0.27981
LOXL4	Spearman Corr.	0.21264
LOXL4	p-value	2.80546e-08
SLC16A9	Spearman Corr.	0.17353
SLC16A9	p-value	6.35524e-06
MEG3	Spearman Corr.	0.24036
MEG3	p-value	3.01872e-10
CD24	Spearman Corr.	0.06973
CD24	p-value	0.0715
PEG3	Spearman Corr.	-0.0444
PEG3	p-value	0.2515
SULT1C2	Spearman Corr.	0.13597
SULT1C2	p-value	0.000420761
EPS8L3	Spearman Corr.	0.04815
EPS8L3	p-value	0.21359
NPC1L1	Spearman Corr.	0.0255
NPC1L1	p-value	0.51032
PITX1	Spearman Corr.	0.12621
PITX1	p-value	0.00107
NPW	Spearman Corr.	0.14955
NPW	p-value	0.00010324
CYP3A7	Spearman Corr.	0.05481
CYP3A7	p-value	0.15679
SPINK1	Spearman Corr.	0.20625
SPINK1	p-value	7.33417e-08
MFAP3L	Spearman Corr.	-0.02354
MFAP3L	p-value	0.5434
BCO2	Spearman Corr.	0.0786
BCO2	p-value	0.04212
SLC46A3	Spearman Corr.	0.0174
SLC46A3	p-value	0.65327
HSD11B1	Spearman Corr.	-0.1286
HSD11B1	p-value	0.000856724
UBXN10	Spearman Corr.	-0.12363
UBXN10	p-value	0.00136
MYRIP	Spearman Corr.	-0.18099
MYRIP	p-value	2.45722e-06
TTC36	Spearman Corr.	-0.08491
TTC36	p-value	0.0281
SLC28A1	Spearman Corr.	-0.02213
SLC28A1	p-value	0.56768
MFSD2A	Spearman Corr.	0.06623
MFSD2A	p-value	0.08693
SLC1A1	Spearman Corr.	0.01133
SLC1A1	p-value	0.76998
CTH	Spearman Corr.	-0.16432
CTH	p-value	1.94476e-05
GYS2	Spearman Corr.	-0.13339
GYS2	p-value	0.0005418
CYP8B1	Spearman Corr.	-0.16607
CYP8B1	p-value	1.57902e-05
ACADL	Spearman Corr.	-0.11095
ACADL	p-value	0.00406
AKR7A3	Spearman Corr.	-0.02634
AKR7A3	p-value	0.49637
ACSM5	Spearman Corr.	-0.09301
ACSM5	p-value	0.01611
C5orf27	Spearman Corr.	-0.00356
C5orf27	p-value	0.92678
TAT	Spearman Corr.	-0.15127
TAT	p-value	8.56745e-05
ADH1B	Spearman Corr.	-0.1375
ADH1B	p-value	0.000361304
GLYAT	Spearman Corr.	-0.15738
GLYAT	p-value	4.3403e-05
MT1X	Spearman Corr.	0.1479
MT1X	p-value	0.000123363
UGT2B7	Spearman Corr.	-0.03149
UGT2B7	p-value	0.4161
UGT2B15	Spearman Corr.	-0.07565
UGT2B15	p-value	0.05048
ADH1C	Spearman Corr.	0.04296
ADH1C	p-value	0.26716
CYP1A2	Spearman Corr.	-0.01361
CYP1A2	p-value	0.72526
SLC22A1	Spearman Corr.	0.02161
SLC22A1	p-value	0.57691
UGT1A5	Spearman Corr.	-0.17858
UGT1A5	p-value	3.35771e-06
NAT2	Spearman Corr.	-0.01094
NAT2	p-value	0.77759
PRAMEF10	Spearman Corr.	0.01904
PRAMEF10	p-value	0.62309
FNDC5	Spearman Corr.	-0.20474
FNDC5	p-value	9.17701e-08
THRSP	Spearman Corr.	0.02767
THRSP	p-value	0.47489
C6	Spearman Corr.	-0.01872
C6	p-value	0.62885
AQP9	Spearman Corr.	-0.23118
AQP9	p-value	1.44369e-09
ALDH1L1	Spearman Corr.	-0.14265
ALDH1L1	p-value	0.000214246
GREM2	Spearman Corr.	-0.1148
GREM2	p-value	0.00294
CYP2A6	Spearman Corr.	-0.05241
CYP2A6	p-value	0.17572
MT2A	Spearman Corr.	0.29234
MT2A	p-value	1.19667e-14
UGT1A4	Spearman Corr.	-0.19836
UGT1A4	p-value	2.31053e-07
CYP3A4	Spearman Corr.	-0.10757
CYP3A4	p-value	0.00535
PCK1	Spearman Corr.	-0.07004
PCK1	p-value	0.07024
CYP1A1	Spearman Corr.	-0.08818
CYP1A1	p-value	0.02255
GCK	Spearman Corr.	-0.0381
GCK	p-value	0.32508
UGT1A3	Spearman Corr.	-0.2162
UGT1A3	p-value	1.61812e-08
BHMT	Spearman Corr.	-0.22907
BHMT	p-value	2.052e-09
CFHR5	Spearman Corr.	-0.0507
CFHR5	p-value	0.19026
SLC10A1	Spearman Corr.	-0.18111
SLC10A1	p-value	2.42221e-06
HPD	Spearman Corr.	-0.12588
HPD	p-value	0.0011
CYP2C8	Spearman Corr.	-0.06627
CYP2C8	p-value	0.08673
HSD17B13	Spearman Corr.	0.03849
HSD17B13	p-value	0.32025
ADH4	Spearman Corr.	-0.02981
ADH4	p-value	0.44144
CYP2A7	Spearman Corr.	-0.0319
CYP2A7	p-value	0.41013
SDS	Spearman Corr.	0.13581
SDS	p-value	0.000427653
PAGE4	Spearman Corr.	-0.21851
PAGE4	p-value	1.12807e-08
PDZK1IP1	Spearman Corr.	0.12333
PDZK1IP1	p-value	0.00139
SAA1	Spearman Corr.	0.35562
SAA1	p-value	2.24798e-21
SAA2	Spearman Corr.	0.35377
SAA2	p-value	3.72475e-21
ALDH3A1	Spearman Corr.	-0.0764
ALDH3A1	p-value	0.04824
ImmuneScore	Spearman Corr.	1
ImmuneScore	p-value	--
