# Supplementary material for: Comprehensive analysis of m6A modification in immune infiltration, metabolism and drug resistance in hepatocellular carcinoma
Source: Cancer Cell Int. 2024 Apr 16;24:138. doi: 10.1186/s12935-024-03307-3 (PMC11022358; doi:10.1186/s12935-024-03307-3)
Supplement: Supplementary file 5 — Supplementary Material 5 [file 12935_2024_3307_MOESM5_ESM.xlsx]

## Sheet: differential genes
DEGs Between m6A clusterA and m6A clusterB
row.names(tT)	logFC	AveExpr	t	P.Value	adj.P.Val	B	regulated
IGF2BP1	4.51831	4.37112	36.4362	5.64403e-161	1.00915e-156	350.043	Up-Regulated
MSI1	1.89527	4.01772	12.375	8.07894e-32	7.22257e-28	61.2295	Up-Regulated
AFP	3.27852	6.52274	11.7059	6.33967e-29	3.77845e-25	54.7158	Up-Regulated
IGF2BP2	1.73705	5.48961	11.3793	1.50431e-27	6.72428e-24	51.6222	Up-Regulated
SALL2	1.3002	4.05078	11.2063	7.86573e-27	2.34399e-23	50.0065	Up-Regulated
BEX2	2.18327	4.2131	10.9168	1.2039e-25	3.07511e-22	47.3423	Up-Regulated
TRIM17	1.04279	2.24611	10.6939	9.52521e-25	2.12888e-21	45.323	Up-Regulated
ARID3A	1.12455	4.78654	10.6185	1.90397e-24	3.78256e-21	44.6469	Up-Regulated
H2AFY2	1.35741	5.5777	10.5653	3.09618e-24	5.53598e-21	44.1724	Up-Regulated
DUSP9	1.56404	5.1931	10.3695	1.82995e-23	2.9745e-20	42.4385	Up-Regulated
LRRC1	1.06345	5.06436	9.80921	2.59212e-21	2.7263e-18	37.6068	Up-Regulated
MYBL2	1.13635	5.47346	9.76084	3.93836e-21	3.91211e-18	37.199	Up-Regulated
GPC3	2.1692	9.35607	9.67311	8.37721e-21	7.51957e-18	36.4632	Up-Regulated
DQX1	1.48215	2.46211	9.67264	8.41116e-21	7.51957e-18	36.4593	Up-Regulated
MCCD1	1.42097	2.36391	9.64414	1.07366e-20	9.14142e-18	36.2213	Up-Regulated
SLC29A4	1.45307	5.0654	9.42065	7.1475e-20	5.5564e-17	34.3739	Up-Regulated
H19	2.41418	9.68907	9.36307	1.15857e-19	8.28612e-17	33.9033	Up-Regulated
SALL4	1.24048	3.13232	9.35356	1.2546e-19	8.62777e-17	33.8257	Up-Regulated
UPK3A	1.80237	3.45068	9.27325	2.4507e-19	1.51098e-16	33.1734	Up-Regulated
DKK1	1.89583	3.64013	9.20523	4.30593e-19	2.33303e-16	32.6244	Up-Regulated
TRIM71	1.04458	2.14364	9.02637	1.86767e-18	8.56257e-16	31.1956	Up-Regulated
WNK2	1.50705	3.50156	8.94923	3.49311e-18	1.45248e-15	30.5861	Up-Regulated
CDCA7	1.20662	3.84169	8.90915	4.82792e-18	1.91829e-15	30.2711	Up-Regulated
SOAT2	1.55811	4.1786	8.8509	7.71258e-18	2.87294e-15	29.8152	Up-Regulated
PDE9A	1.02603	4.68044	8.75421	1.66956e-17	5.74071e-15	29.0637	Up-Regulated
DYDC2	1.09946	3.33485	8.69046	2.76824e-17	8.99929e-15	28.5717	Up-Regulated
EVC2	1.00358	3.45671	8.5913	6.04364e-17	1.83153e-14	27.8122	Up-Regulated
MMP11	1.10597	5.80384	8.55554	7.99577e-17	2.34368e-14	27.54	Up-Regulated
GNAZ	1.01447	4.94442	8.45159	1.79459e-16	4.68517e-14	26.7539	Up-Regulated
GAL3ST1	1.26914	4.8073	8.39553	2.76629e-16	6.96637e-14	26.3332	Up-Regulated
SLC13A2	1.17332	3.42116	8.34305	4.13961e-16	1.01225e-13	25.9414	Up-Regulated
PRR15L	1.27404	4.19538	8.29268	6.08397e-16	1.36765e-13	25.5672	Up-Regulated
CTNND2	1.63734	3.22892	8.27807	6.80026e-16	1.48279e-13	25.459	Up-Regulated
MAPK13	1.10597	5.02184	8.25852	7.89067e-16	1.65983e-13	25.3145	Up-Regulated
DMKN	1.60885	3.64423	8.16466	1.60529e-15	3.15413e-13	24.6245	Up-Regulated
B4GALNT2	1.20291	2.26271	8.14585	1.84943e-15	3.55568e-13	24.4869	Up-Regulated
PNMA3	1.25287	4.11059	8.14147	1.91132e-15	3.59731e-13	24.455	Up-Regulated
FER1L6	1.09991	2.30028	8.00718	5.20971e-15	8.9567e-13	23.4812	Up-Regulated
OCA2	1.07439	2.40564	8.00009	5.4909e-15	9.262e-13	23.4301	Up-Regulated
VIL1	1.38589	6.22315	7.99637	5.64412e-15	9.43148e-13	23.4034	Up-Regulated
MDK	1.03568	8.3124	7.95415	7.71224e-15	1.26509e-12	23.1003	Up-Regulated
IGSF1	1.18068	3.80286	7.83297	1.87541e-14	2.86601e-12	22.2379	Up-Regulated
HMGA2	1.08109	2.19713	7.79101	2.54459e-14	3.76011e-12	21.9418	Up-Regulated
UNC93A	1.2479	4.6526	7.77447	2.86875e-14	4.13655e-12	21.8254	Up-Regulated
COL2A1	1.62068	2.64771	7.68603	5.42803e-14	7.13626e-12	21.2069	Up-Regulated
FOXQ1	1.44746	4.44064	7.61225	9.19937e-14	1.13438e-11	20.6953	Up-Regulated
ZIC5	1.01995	3.20499	7.54962	1.43491e-13	1.67687e-11	20.2643	Up-Regulated
CXCL17	1.01342	2.68921	7.53979	1.5382e-13	1.7407e-11	20.1969	Up-Regulated
PEG10	1.94146	6.05268	7.525	1.70754e-13	1.88462e-11	20.0957	Up-Regulated
PLEKHB1	1.07941	3.56786	7.4184	3.60695e-13	3.68527e-11	19.371	Up-Regulated
SLC7A10	1.07034	2.50235	7.41304	3.74424e-13	3.78232e-11	19.3348	Up-Regulated
WNK4	1.24589	4.12338	7.38634	4.50894e-13	4.42966e-11	19.1548	Up-Regulated
ETV4	1.18175	5.20683	7.34997	5.80274e-13	5.43209e-11	18.9105	Up-Regulated
CACNG4	1.14019	3.05936	7.34643	5.94677e-13	5.50924e-11	18.8867	Up-Regulated
HS6ST2	1.13566	2.43306	7.30872	7.71515e-13	6.82906e-11	18.6346	Up-Regulated
FXYD2	1.74453	4.66415	7.27351	9.82922e-13	8.49017e-11	18.4001	Up-Regulated
SLC6A11	1.21532	2.81775	7.24108	1.22742e-12	1.04506e-10	18.185	Up-Regulated
ANXA13	1.27864	5.58094	7.22982	1.32555e-12	1.11223e-10	18.1106	Up-Regulated
PGC	2.08092	3.36149	7.21355	1.48124e-12	1.21489e-10	18.0031	Up-Regulated
IGF2	1.95693	8.05746	7.19023	1.73608e-12	1.3735e-10	17.8494	Up-Regulated
EPCAM	1.70909	4.51876	7.14055	2.43123e-12	1.7963e-10	17.5235	Up-Regulated
ENPP3	1.04974	3.92592	7.08459	3.54466e-12	2.50508e-10	17.1587	Up-Regulated
PRAME	1.42472	2.98105	7.07862	3.68969e-12	2.56699e-10	17.1199	Up-Regulated
FRAS1	1.08972	3.63525	7.02195	5.39055e-12	3.59638e-10	16.7532	Up-Regulated
GPC5	1.01276	3.04353	7.01994	5.46339e-12	3.63143e-10	16.7403	Up-Regulated
ISX	1.33599	3.73545	6.90671	1.15624e-11	7.0318e-10	16.0155	Up-Regulated
TRIM50	1.23339	3.20592	6.90353	1.18069e-11	7.10799e-10	15.9952	Up-Regulated
MEP1A	1.43486	3.50881	6.89178	1.2754e-11	7.57614e-10	15.9207	Up-Regulated
S100A14	1.10172	5.47343	6.82093	2.02664e-11	1.13239e-09	15.4732	Up-Regulated
S100P	1.81545	5.27557	6.73853	3.45572e-11	1.84093e-09	14.9577	Up-Regulated
GNG4	1.2932	3.51465	6.60918	7.89913e-11	3.72655e-09	14.1597	Up-Regulated
PDX1	1.17321	2.94003	6.60594	8.06334e-11	3.78406e-09	14.1398	Up-Regulated
DLK1	1.78431	3.00776	6.56966	1.01417e-10	4.60239e-09	13.9186	Up-Regulated
C1orf106	1.07656	4.74886	6.52825	1.316e-10	5.78137e-09	13.6673	Up-Regulated
FAM3B	1.39804	4.61483	6.43258	2.38992e-10	9.39159e-09	13.092	Up-Regulated
CDHR2	1.21596	4.44381	6.23369	8.06726e-10	2.68608e-08	11.9202	Up-Regulated
MYH4	1.74698	3.22257	6.20185	9.77234e-10	3.1769e-08	11.7356	Up-Regulated
XPNPEP2	1.32018	5.67694	6.04273	2.51646e-09	7.2338e-08	10.8259	Up-Regulated
LOXL4	1.1198	5.70825	6.04144	2.53551e-09	7.2652e-08	10.8187	Up-Regulated
SLC16A9	1.09599	3.46913	6.03751	2.59482e-09	7.42164e-08	10.7964	Up-Regulated
MEG3	1.06556	4.73799	5.9827	3.57607e-09	9.82185e-08	10.4882	Up-Regulated
CD24	1.16341	7.87823	5.88314	6.363e-09	1.60466e-07	9.93479	Up-Regulated
PEG3	1.15795	4.17385	5.82907	8.67098e-09	2.10935e-07	9.63776	Up-Regulated
SULT1C2	1.04638	5.12638	5.82003	9.12936e-09	2.20883e-07	9.58834	Up-Regulated
EPS8L3	1.01963	4.96411	5.69023	1.89833e-08	4.03593e-07	8.88635	Up-Regulated
NPC1L1	1.18091	5.50762	5.62441	2.73691e-08	5.52949e-07	8.53583	Up-Regulated
PITX1	1.01037	3.71904	5.39217	9.66438e-08	1.61646e-06	7.32888	Up-Regulated
NPW	1.05479	4.84856	5.33135	1.3347e-07	2.11787e-06	7.0205	Up-Regulated
CYP3A7	1.11255	7.91513	5.00514	7.14589e-07	8.75127e-06	5.4214	Up-Regulated
SPINK1	1.10036	8.41009	3.3716	0.000790356	0.0034093	-1.15003	Up-Regulated
MFAP3L	-1.11528	5.14409	-10.3174	2.9267e-23	4.36078e-20	41.9802	Down-Regulated
BCO2	-1.13957	4.29121	-9.10825	9.56637e-19	4.62289e-16	31.847	Down-Regulated
SLC46A3	-1.17904	6.89076	-8.78603	1.29586e-17	4.63399e-15	29.3102	Down-Regulated
HSD11B1	-1.91329	8.77819	-8.47509	1.4958e-16	4.16562e-14	26.9309	Down-Regulated
UBXN10	-1.12578	4.70057	-8.4735	1.51435e-16	4.16562e-14	26.919	Down-Regulated
MYRIP	-1.08271	5.54612	-8.28278	6.56086e-16	1.44825e-13	25.4938	Down-Regulated
TTC36	-1.53604	4.6792	-8.19473	1.27954e-15	2.57057e-13	24.8448	Down-Regulated
SLC28A1	-1.24515	5.72002	-8.17456	1.48992e-15	2.95997e-13	24.6969	Down-Regulated
MFSD2A	-1.46011	5.43023	-7.87366	1.39324e-14	2.21869e-12	22.5263	Down-Regulated
SLC1A1	-1.11127	6.02177	-7.81788	2.09318e-14	3.17171e-12	22.1313	Down-Regulated
CTH	-1.05958	7.21051	-7.73812	3.73116e-14	5.21196e-12	21.5705	Down-Regulated
GYS2	-1.25482	6.10187	-7.54614	1.47064e-13	1.69323e-11	20.2405	Down-Regulated
CYP8B1	-1.74139	8.217	-7.46391	2.62388e-13	2.76058e-11	19.6794	Down-Regulated
ACADL	-1.1777	4.8671	-7.46361	2.62948e-13	2.76058e-11	19.6773	Down-Regulated
AKR7A3	-1.20855	7.77344	-7.40544	3.94786e-13	3.9656e-11	19.2835	Down-Regulated
ACSM5	-1.0584	7.02932	-7.32174	7.05297e-13	6.36905e-11	18.7215	Down-Regulated
C5orf27	-1.48601	5.06429	-7.13886	2.45918e-12	1.80947e-10	17.5124	Down-Regulated
TAT	-1.56524	9.45517	-7.09742	3.25192e-12	2.32578e-10	17.2421	Down-Regulated
ADH1B	-1.31282	11.0332	-7.04579	4.59735e-12	3.14945e-10	16.9072	Down-Regulated
GLYAT	-1.50301	7.10909	-7.01794	5.53653e-12	3.66641e-10	16.7274	Down-Regulated
MT1X	-1.37863	8.74206	-7.01611	5.60438e-12	3.69765e-10	16.7156	Down-Regulated
UGT2B7	-1.03872	8.66762	-6.89062	1.28515e-11	7.60875e-10	15.9133	Down-Regulated
UGT2B15	-1.23133	8.84572	-6.86151	1.55522e-11	8.91259e-10	15.729	Down-Regulated
ADH1C	-1.60823	9.8446	-6.85576	1.61486e-11	9.19545e-10	15.6926	Down-Regulated
CYP1A2	-1.78743	4.86076	-6.68721	4.80498e-11	2.44071e-09	14.6395	Down-Regulated
SLC22A1	-1.52917	7.68145	-6.65309	5.97504e-11	2.95329e-09	14.4291	Down-Regulated
UGT1A5	-1.00754	6.40099	-6.65298	5.97925e-11	2.95329e-09	14.4284	Down-Regulated
NAT2	-1.18048	4.45175	-6.49636	1.60694e-10	6.80856e-09	13.4747	Down-Regulated
PRAMEF10	-1.13927	2.92137	-6.49325	1.63846e-10	6.89309e-09	13.4559	Down-Regulated
FNDC5	-1.31055	5.55557	-6.48643	1.70969e-10	7.12569e-09	13.4149	Down-Regulated
THRSP	-1.74909	5.41202	-6.4458	2.20171e-10	8.74626e-09	13.1711	Down-Regulated
C6	-1.00309	9.27276	-6.37534	3.40292e-10	1.29456e-08	12.7515	Down-Regulated
AQP9	-1.24008	9.70186	-6.36703	3.58143e-10	1.34529e-08	12.7022	Down-Regulated
ALDH1L1	-1.23057	9.65665	-6.10083	1.78585e-09	5.42123e-08	11.1556	Down-Regulated
GREM2	-1.10533	4.4107	-6.08384	1.97481e-09	5.91449e-08	11.0589	Down-Regulated
CYP2A6	-1.71707	8.31999	-6.03727	2.59841e-09	7.42164e-08	10.7951	Down-Regulated
MT2A	-1.06753	10.4326	-6.01446	2.97035e-09	8.33751e-08	10.6665	Down-Regulated
UGT1A4	-1.32536	8.8868	-5.83454	8.40495e-09	2.04742e-07	9.66767	Down-Regulated
CYP3A4	-1.79335	8.50215	-5.7327	1.49633e-08	3.3611e-07	9.11444	Down-Regulated
PCK1	-1.14081	9.57161	-5.69929	1.80463e-08	3.87821e-07	8.93486	Down-Regulated
CYP1A1	-1.35221	4.69786	-5.66626	2.16979e-08	4.52165e-07	8.75827	Down-Regulated
GCK	-1.09683	2.95827	-5.65388	2.32448e-08	4.78822e-07	8.69229	Down-Regulated
UGT1A3	-1.07325	7.88005	-5.60936	2.97411e-08	5.92832e-07	8.45624	Down-Regulated
BHMT	-1.07467	9.55685	-5.57849	3.52503e-08	6.82915e-07	8.29352	Down-Regulated
CFHR5	-1.12002	8.16157	-5.45868	6.76511e-08	1.18877e-06	7.66981	Down-Regulated
SLC10A1	-1.19696	8.21167	-5.3785	1.03947e-07	1.71613e-06	7.25928	Down-Regulated
HPD	-1.39344	10.4969	-5.31849	1.42849e-07	2.24244e-06	6.95566	Down-Regulated
CYP2C8	-1.07499	9.55852	-5.18141	2.91897e-07	4.09021e-06	6.27391	Down-Regulated
HSD17B13	-1.309	6.4003	-5.08954	4.67027e-07	6.07747e-06	5.82616	Down-Regulated
ADH4	-1.17778	9.83297	-4.89003	1.26392e-06	1.41598e-05	4.87943	Down-Regulated
CYP2A7	-1.1689	4.96687	-4.70755	3.04891e-06	2.98219e-05	4.04432	Down-Regulated
SDS	-1.17272	8.39488	-4.68782	3.34761e-06	3.21629e-05	3.95582	Down-Regulated
PAGE4	-1.25462	3.38592	-4.64634	4.07001e-06	3.82808e-05	3.77089	Down-Regulated
PDZK1IP1	-1.06518	5.95716	-4.55797	6.141e-06	5.41693e-05	3.38198	Down-Regulated
SAA1	-1.14149	8.8536	-4.17813	3.32909e-05	0.000231521	1.79059	Down-Regulated
SAA2	-1.15468	7.55353	-4.10857	4.47511e-05	0.000298008	1.51335	Down-Regulated
ALDH3A1	-1.16843	5.2244	-3.89153	0.000109584	0.000642474	0.676818	Down-Regulated

## Sheet:  Univariate COX analysis 
A Total of 50 Survival-Related Genes Were Identified by Univariate COX Analysis
Tag	p.value	HR	Low 95%CI	High 95%CI	KMplot_pvalue
SLC22A1	7.14135e-06	0.903972	0.864995	0.944706	6.46264e-05
MYBL2	7.33147e-06	1.21726	1.11702	1.32649	8.61971e-05
ETV4	0.000576391	1.12439	1.05179	1.20201	0.00012071
MEP1A	5.0409e-05	1.1012	1.05105	1.15375	0.00019119
UGT2B15	5.11078e-05	0.895573	0.849031	0.944666	0.000486178
SLC10A1	5.6444e-05	0.914196	0.875141	0.954994	0.000725641
LRRC1	0.00532557	1.15368	1.04332	1.2757	0.000842897
EPS8L3	0.0223849	1.07443	1.01023	1.14271	0.00100847
BHMT	0.000675661	0.913191	0.866606	0.962279	0.00102414
CYP3A4	0.00147651	0.943462	0.910211	0.977927	0.00171239
CYP2C8	0.0110348	0.93949	0.89534	0.985817	0.00237673
GNAZ	0.00154701	1.15188	1.05533	1.25725	0.0030343
C5orf27	6.29992e-05	0.891711	0.843028	0.943205	0.00330566
ADH1C	1.24702e-06	0.902812	0.866256	0.940911	0.00394206
GYS2	0.00390203	0.914988	0.861413	0.971895	0.0040711
CTH	0.0209497	0.912868	0.844889	0.986318	0.00430849
HSD17B13	0.00856776	0.946205	0.90799	0.986029	0.00462476
PRAME	0.0136518	1.06492	1.013	1.11951	0.00464679
THRSP	0.0168265	0.952062	0.914477	0.991192	0.0063602
SLC29A4	0.0127833	1.08772	1.01805	1.16215	0.00663577
TAT	0.000182301	0.913785	0.871639	0.957968	0.00747981
ZIC5	0.00821095	1.10998	1.02734	1.19927	0.00753359
GCK	0.0464133	0.937236	0.879317	0.99897	0.00757528
PEG10	0.122437	1.0338	0.991101	1.07835	0.00845725
SDS	0.0322574	0.953934	0.913629	0.996016	0.00914702
B4GALNT2	0.105356	1.05369	0.989063	1.12254	0.00998215
ACSM5	0.0442587	0.929309	0.865243	0.998119	0.0101161
CYP8B1	0.00564816	0.941876	0.902768	0.982678	0.0106396
C6	2.98979e-05	0.887359	0.838939	0.938574	0.0110344
FNDC5	0.0103926	0.93449	0.887295	0.984195	0.0127423
XPNPEP2	0.1936	1.03343	0.983446	1.08595	0.0135932
GLYAT	0.00840585	0.93639	0.891719	0.983298	0.0137839
IGSF1	0.062107	1.06347	0.99689	1.1345	0.0152499
ADH4	0.000340209	0.927483	0.89006	0.966478	0.0154182
SALL2	0.223755	1.05689	0.966755	1.15544	0.0165695
PDX1	0.0828996	1.05202	0.993417	1.11407	0.0188878
HMGA2	0.000367815	1.12146	1.05291	1.19446	0.0199606
CYP2A6	0.00423446	0.945476	0.909838	0.982509	0.0203328
TTC36	0.00910078	0.927569	0.876614	0.981485	0.0204388
EVC2	0.0270799	1.10493	1.01137	1.20715	0.0210935
SLC46A3	0.00197902	0.884853	0.818858	0.956167	0.0218341
CFHR5	9.48426e-06	0.898872	0.857445	0.942301	0.0247601
GNG4	0.000944645	1.08474	1.03368	1.13832	0.026286
ADH1B	0.000338777	0.903067	0.854088	0.954855	0.0330204
SAA2	0.00401091	0.94367	0.907127	0.981685	0.033104
SLC28A1	0.00406607	0.904345	0.844395	0.968553	0.0346018
CDHR2	0.00515882	1.08109	1.02361	1.14181	0.0358129
TRIM71	0.110797	1.07295	0.983998	1.16994	0.0381601
AKR7A3	0.00962665	0.919732	0.863279	0.979877	0.0461662
C1orf106	0.0415207	1.06878	1.00256	1.13937	0.0477779
